# Supplementary material for: Critical evaluation of linear regression models for cell-subtype specific methylation signal from mixed blood cell DNA
Source: PubMed Central journal article supplement (PMC6301777; doi:10.1371/journal.pone.0208915), 2018-12-20

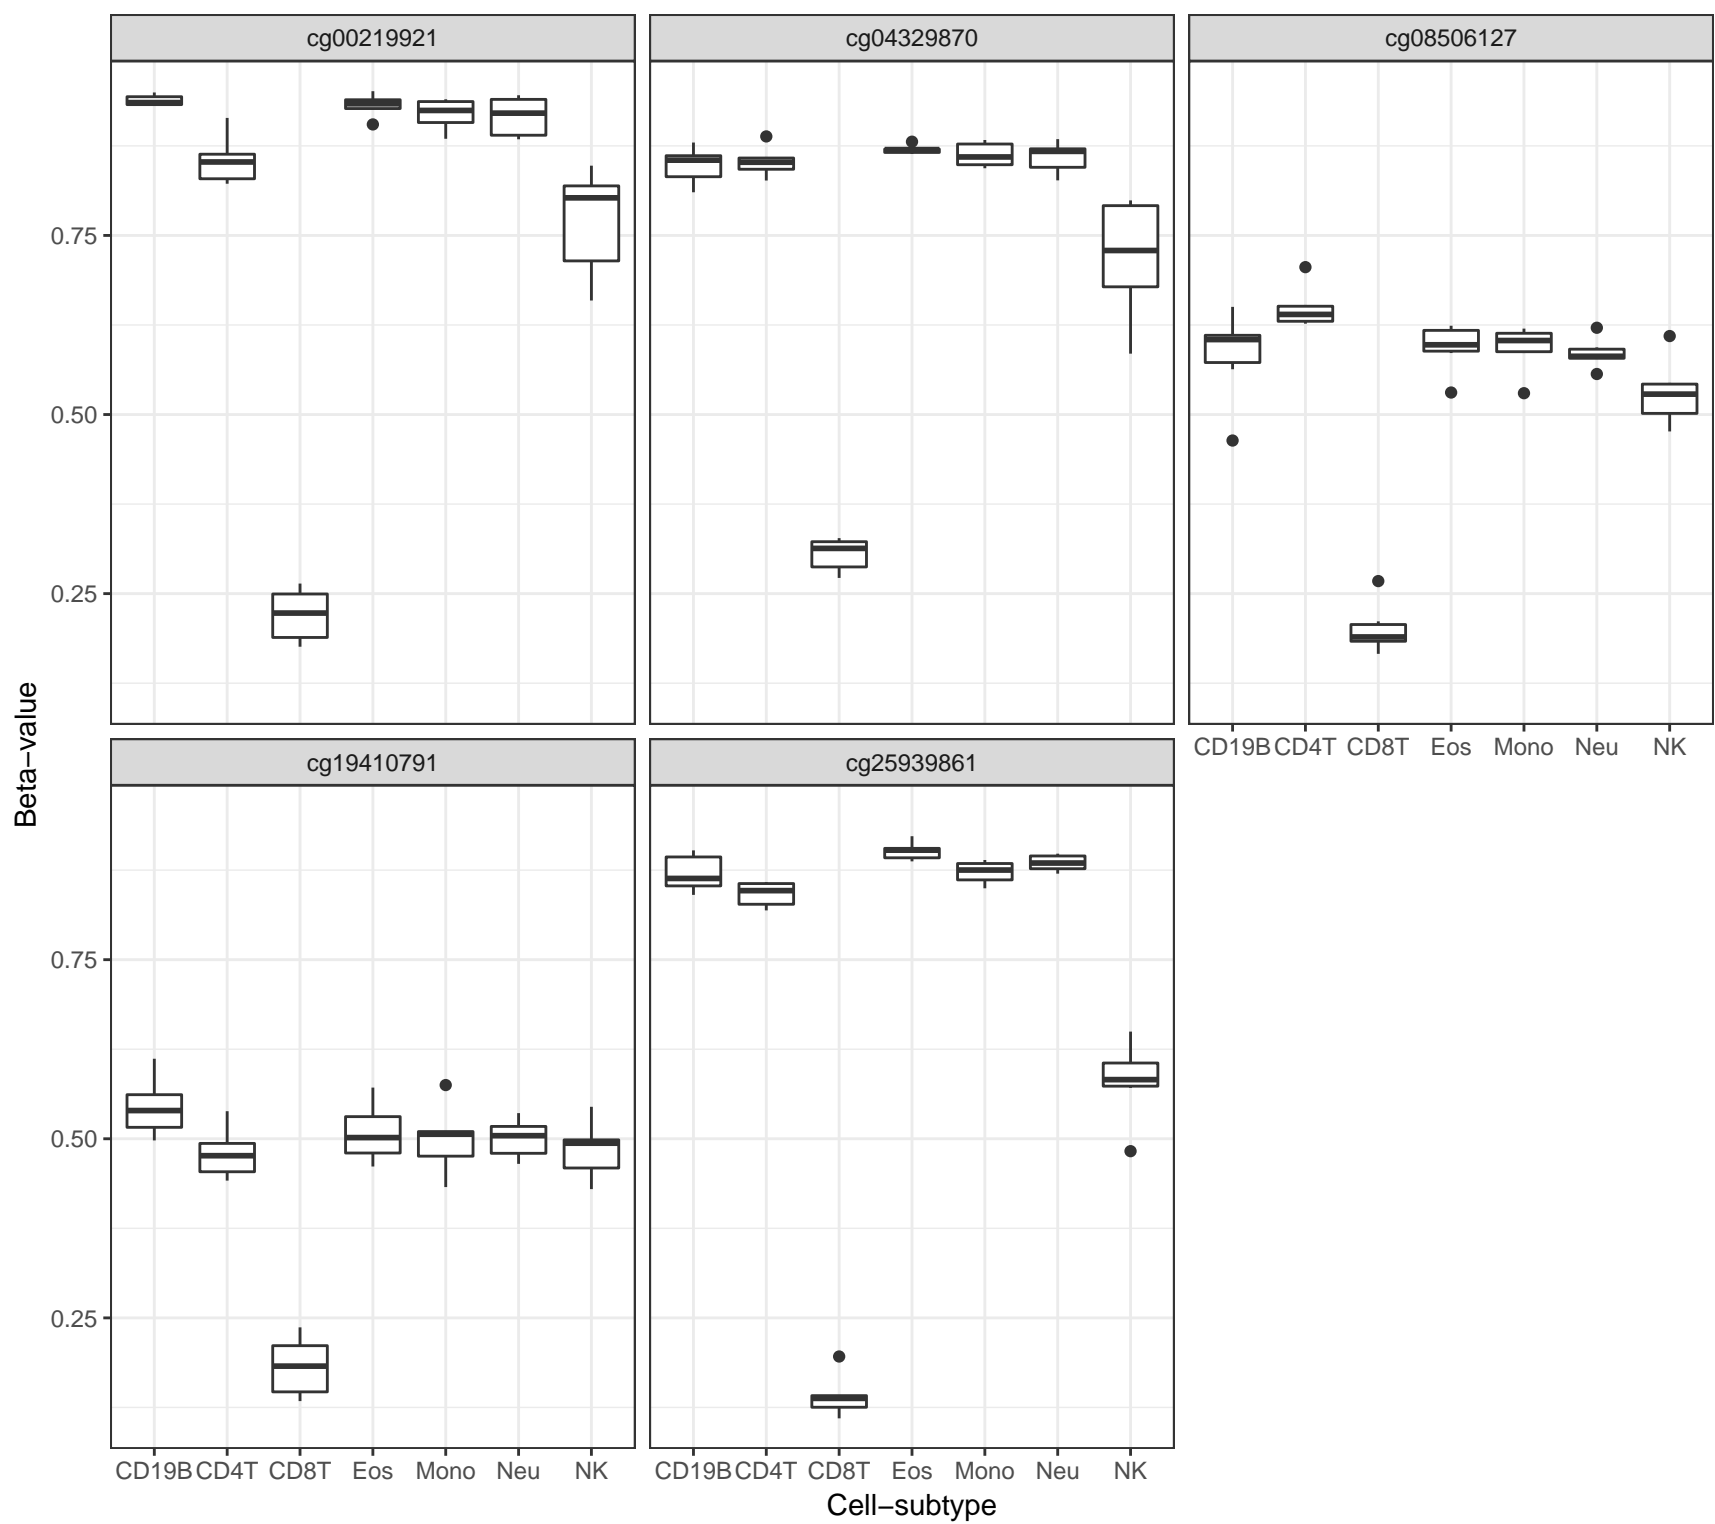

Supplement: pone.0208915.s009.pdf [file pone.0208915.s009.pdf]
